# Supplementary material
Source: publisher figshare collection journal article supplement (https://frontiersin.figshare.com/ndownloader/files/32707862)
Supplement: Supplementary file [file 32707862]

## **Supplementary Information**

**Immune dysfunctions of CD56<sup>neg</sup> NK cells are  
associated with HIV-1 disease progression**

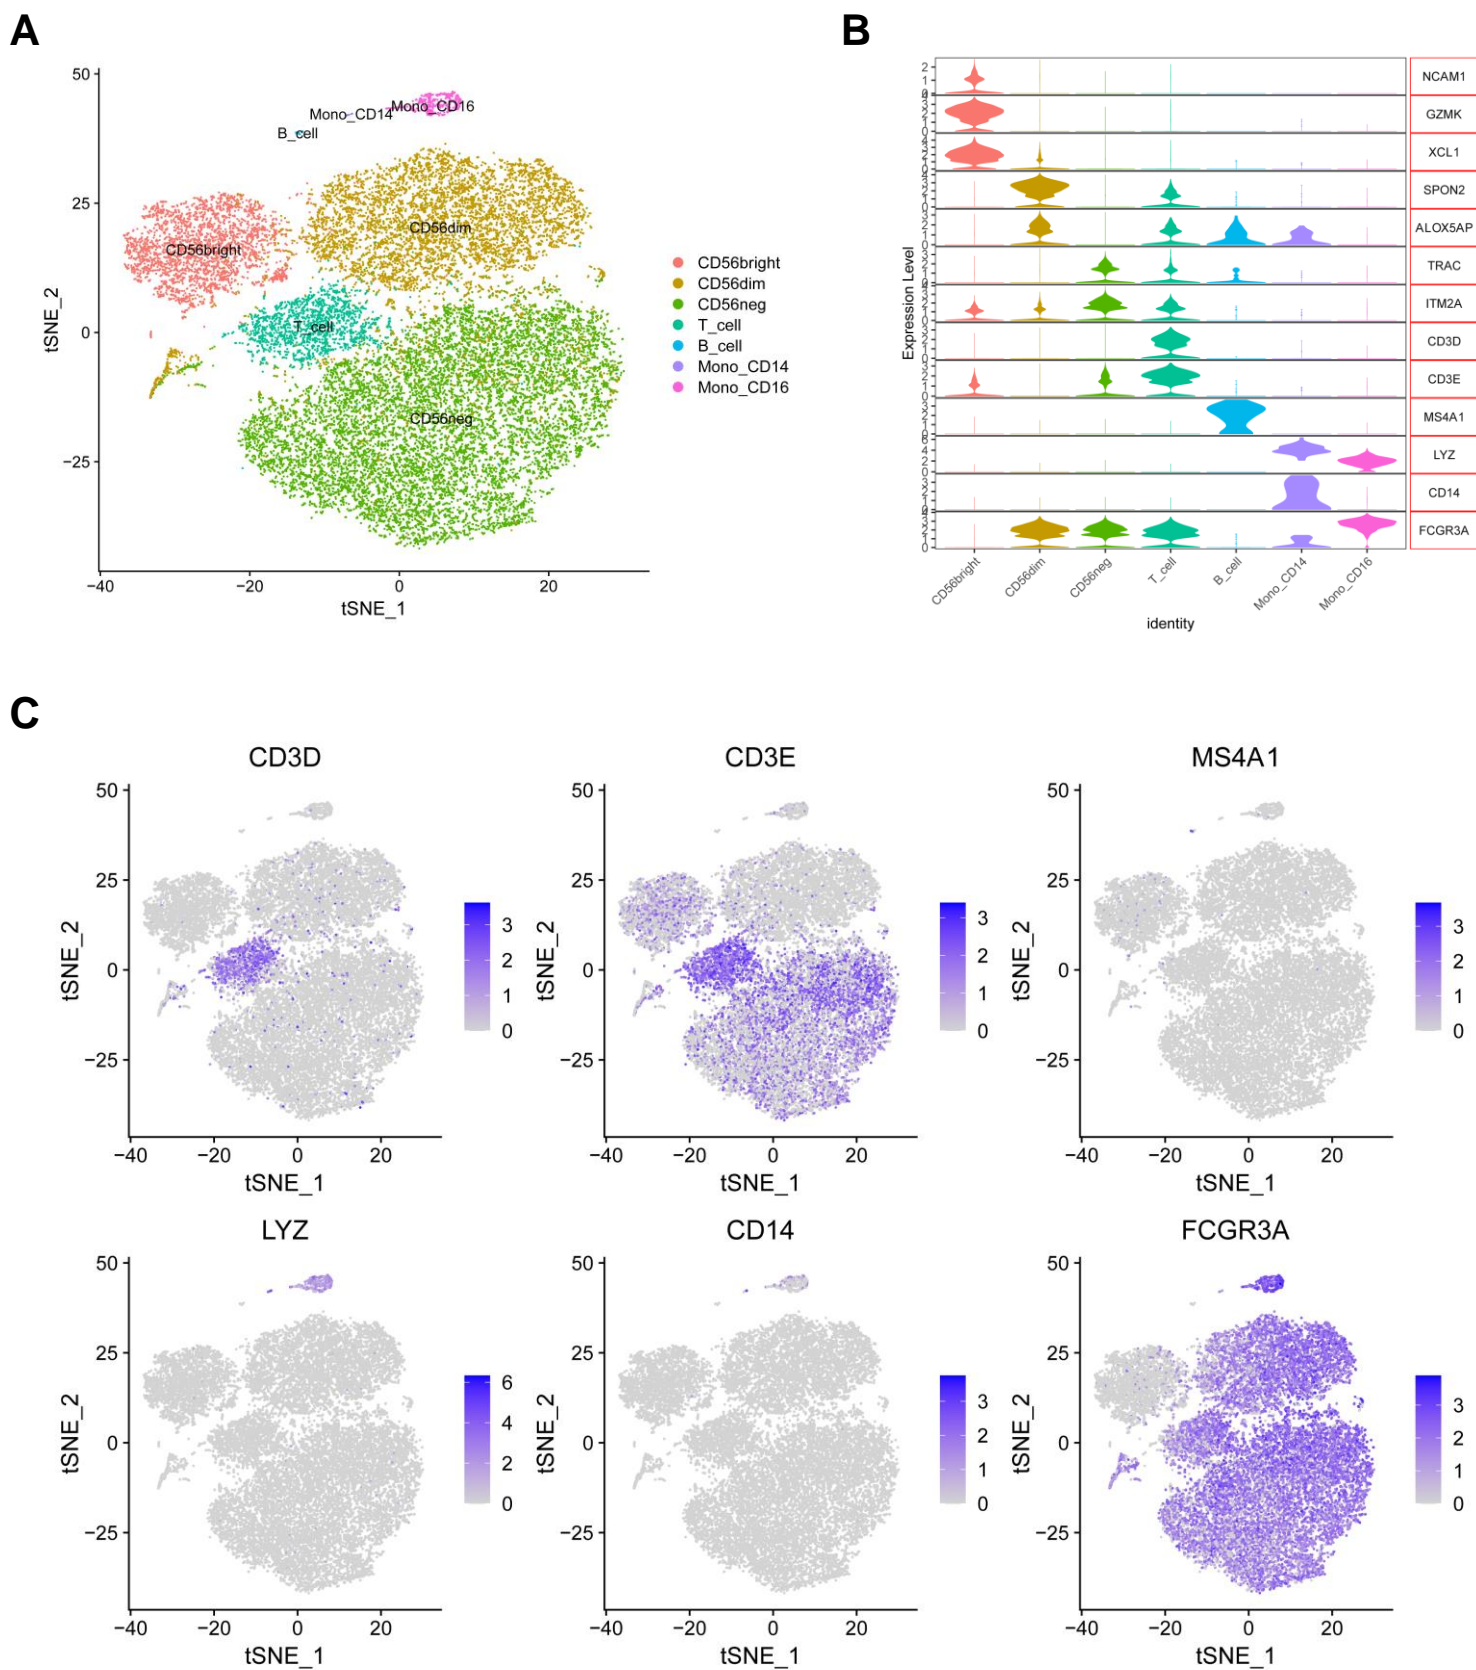

**Supplementary Figure 1. Excluding the cells that did not belong to NK cells**

(A) TSNE dimplot showed the annotation of all the 7 types of cells in the dataset. (B) Vlnplot showed the expressions of canonical markers of the 7 types of cells. (C) The expression of canonical markers of T cells, B cells, and monocyte (Mono CD14/CD16) were shown.

**A**

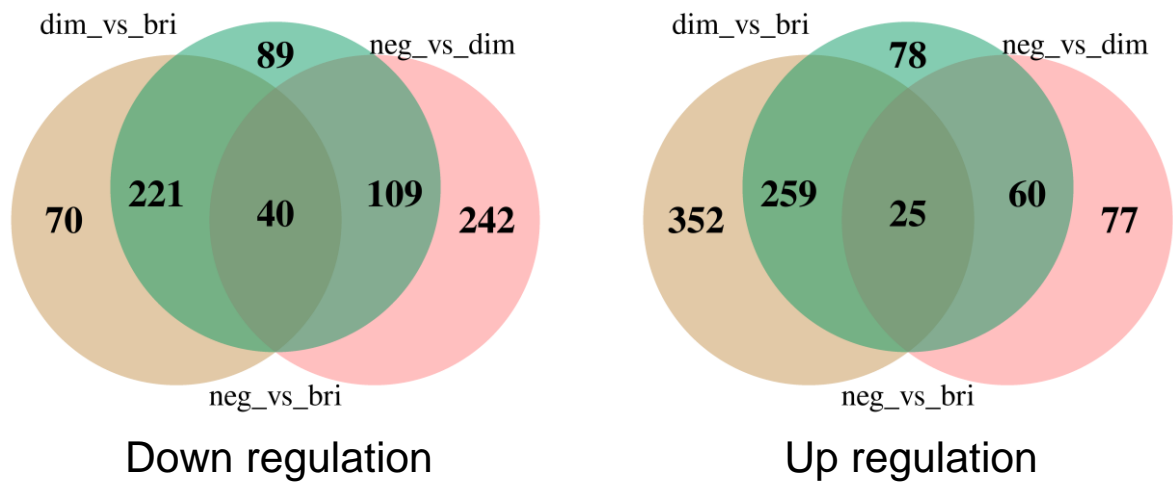

**B**

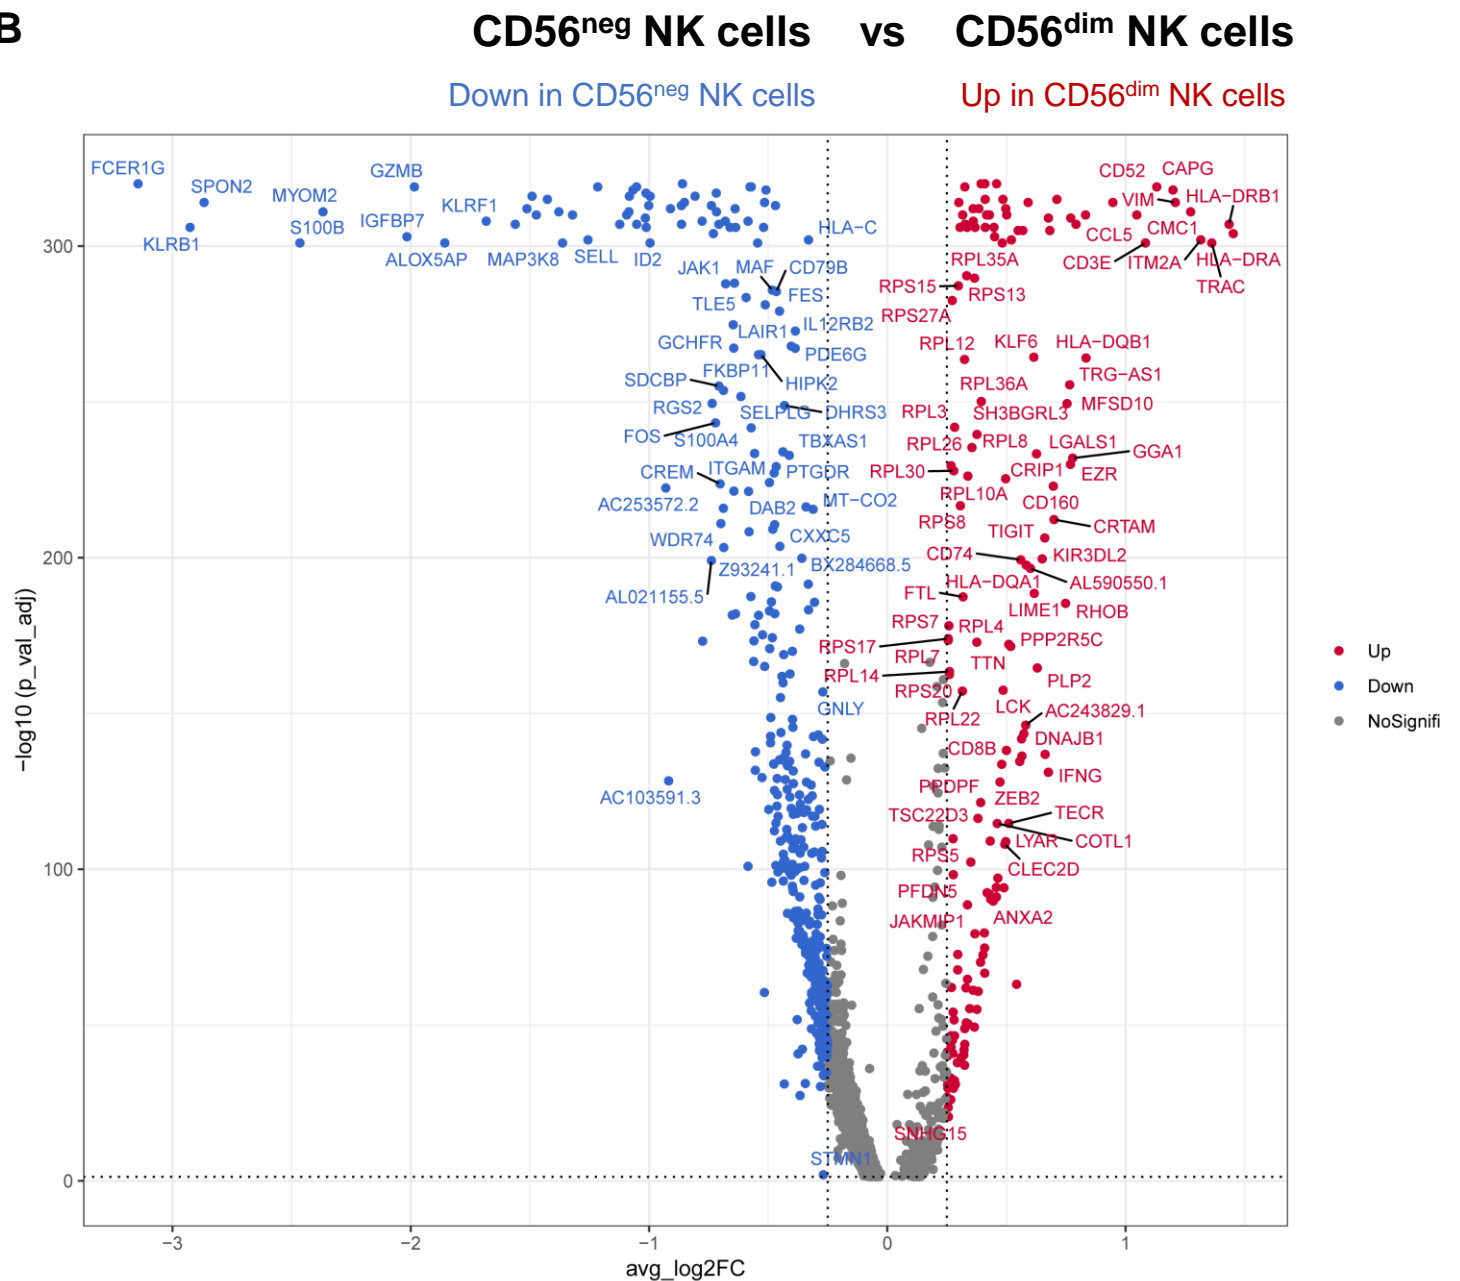

**Supplementary Figure 2. Differentially expressed genes (DEGs) in the three NK cell subsets**

(A) Two Venn diagrams separately showing the relationship of up- and downregulated DEGs between three NK cell subsets. These DEGs were identified using a threshold of “avg\_log2FC > 0.25 & p\_val\_adj < 0.05”. (B) Volcano plot showing a more detailed analysis of up- and downregulated DEGs between CD56<sup>neg</sup> and CD56<sup>dim</sup> NK cells.

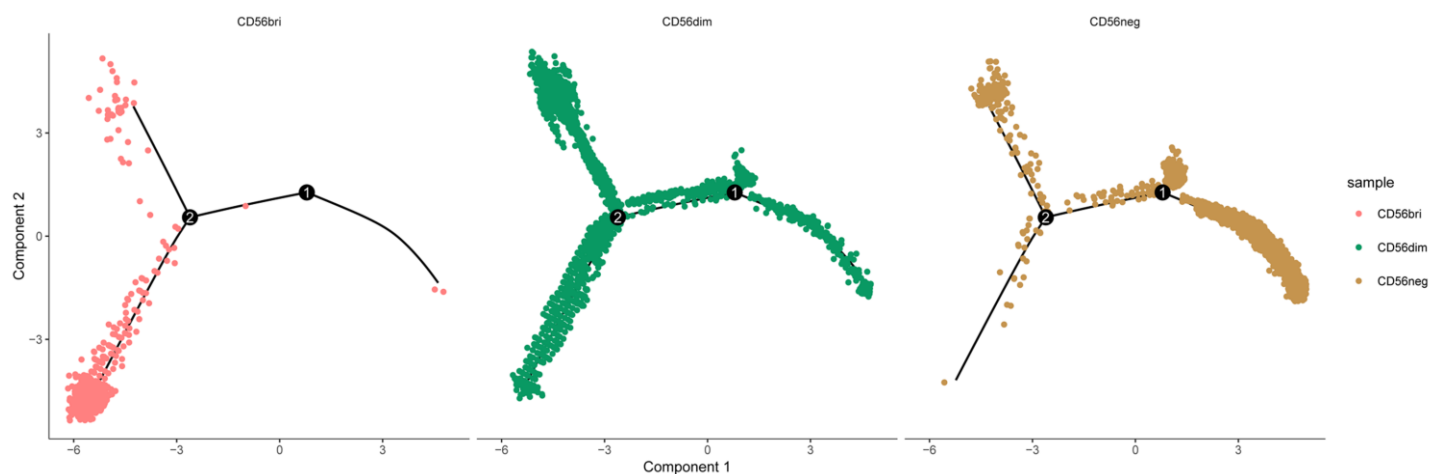

**Supplementary Figure 3. The distributions of three NK cell subsets in pseudotime analysis**

Three dotplots showing the distributions of three NK cell subsets separately. The DDRTree algorithm was used for dimension reduction.

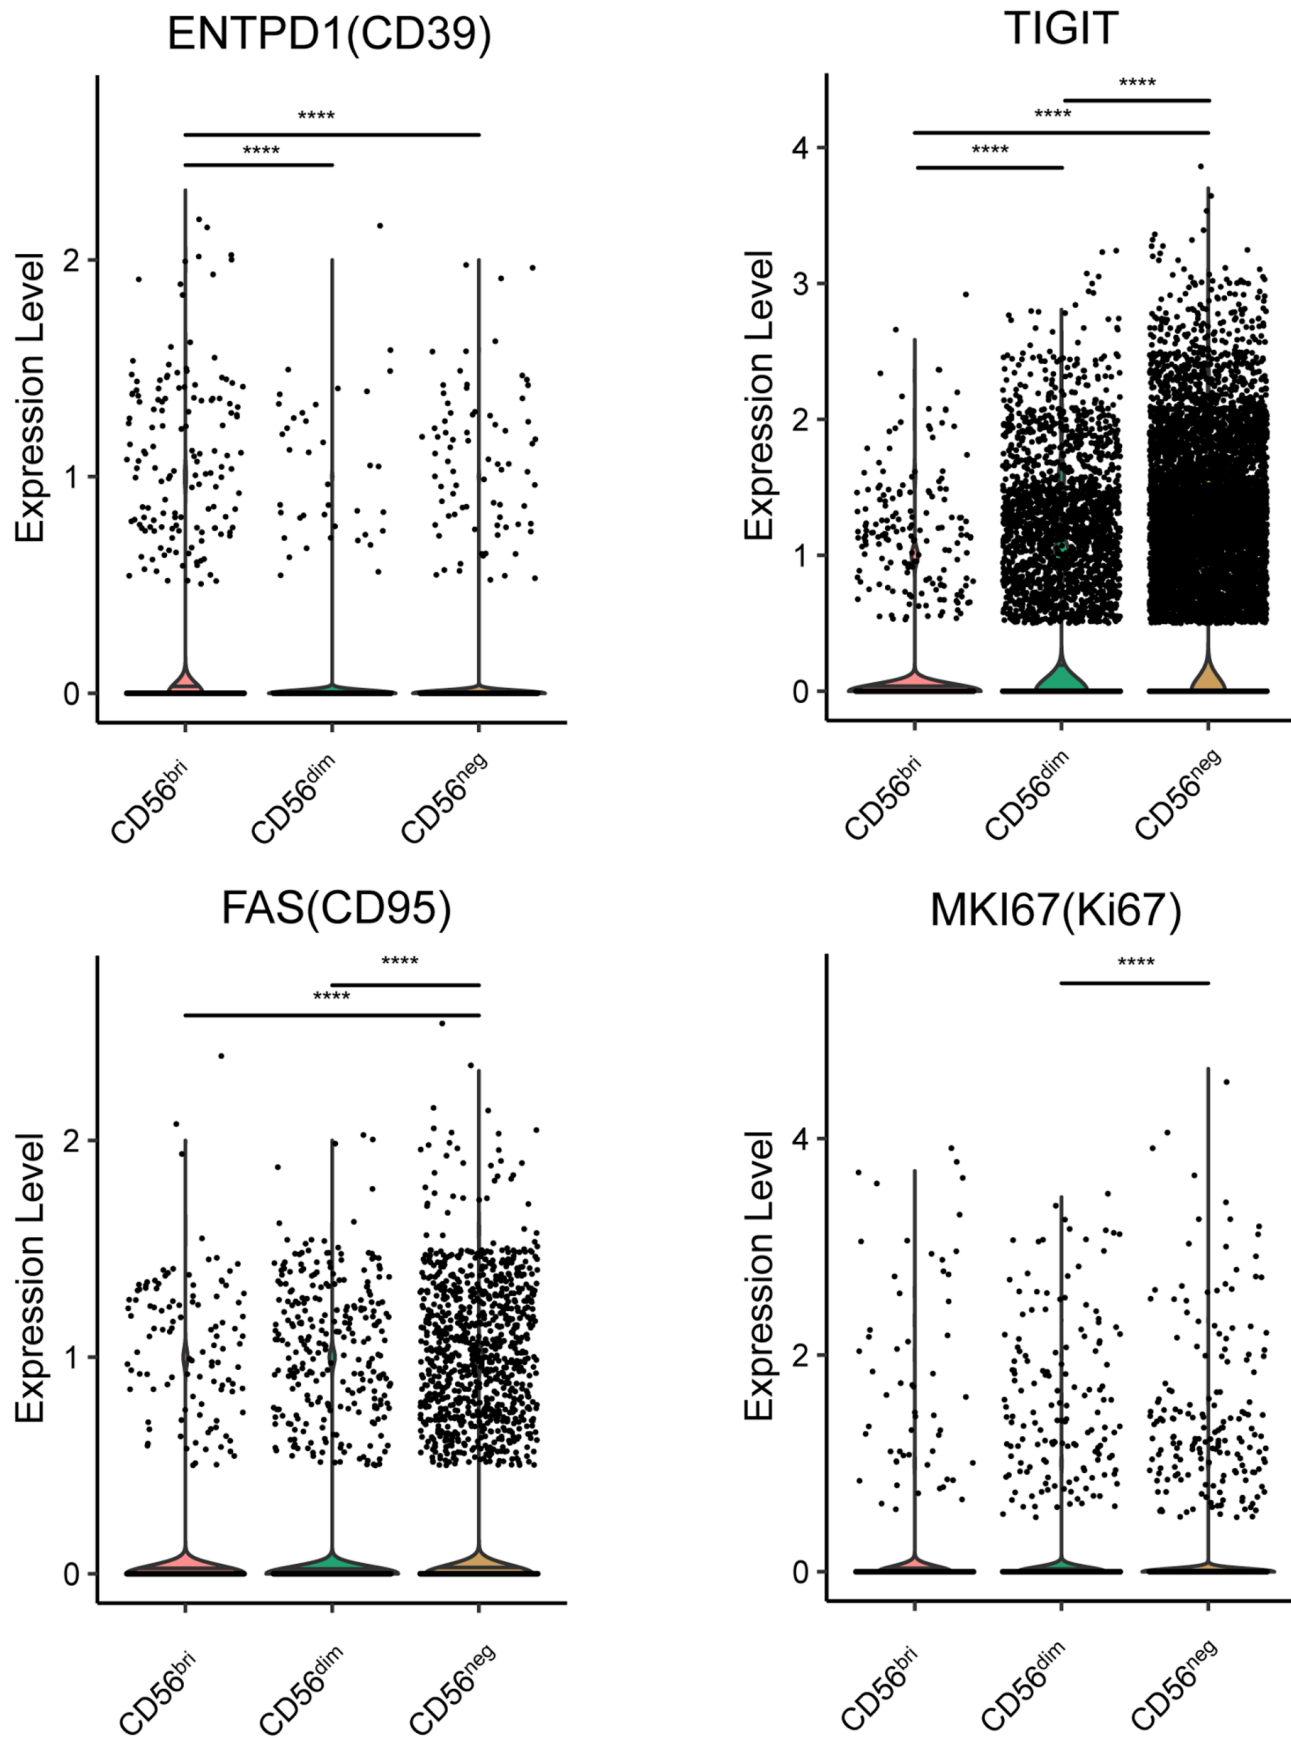

**Supplementary Figure 4. Jitter and violin plots showing single-cell expression levels of selected genes in cells derived from peripheral blood of HIV-1-infected patients**

Expression levels were calculated by  $\log_2(count + 1)$ , in which *count* represents the unique molecular identifier (UMI) count of a particular gene. Statistical significance between two groups was calculated by Mann-Whitney U-test. \* $p < 0.05$ , \*\* $p < 0.01$ , and \*\*\*\* $p < 0.0001$

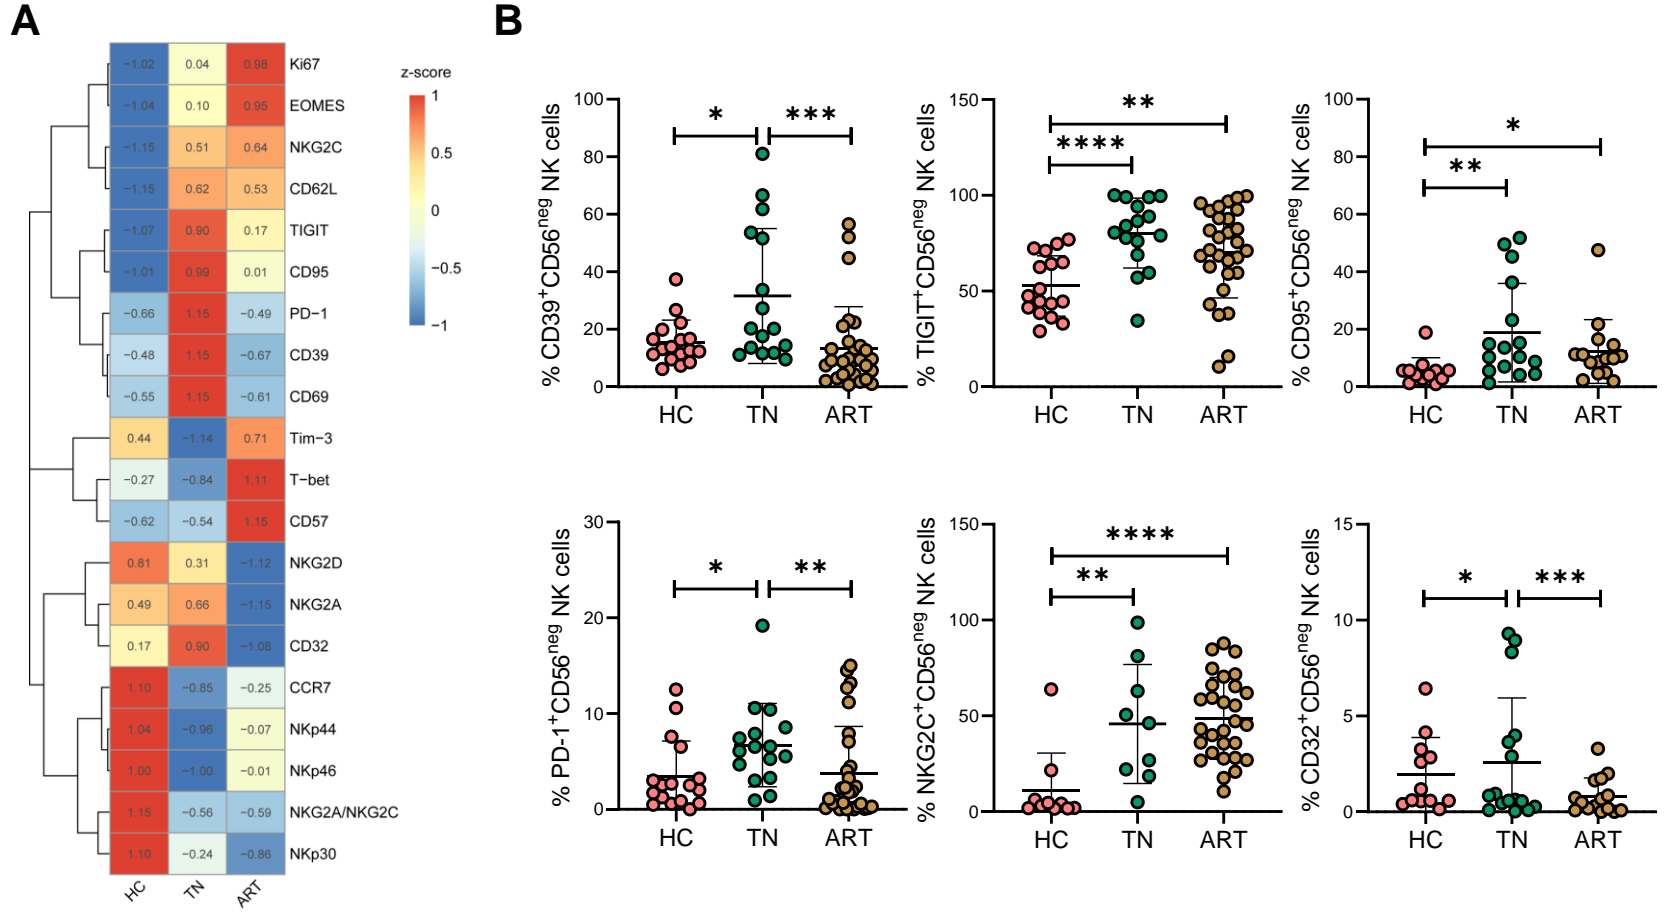

**Supplementary Figure 5. Phenotypic of CD56<sup>neg</sup> NK cells among three groups of participants**

(A) Heatmap showing the percentage of CD56<sup>neg</sup> NK cells with specific protein expression across the three groups of participants, which was determined by flow cytometry. Data were scaled using z-score. (B) Expression of CD39, TIGIT, CD95, PD-1, NKG2C, and CD32 of CD56<sup>neg</sup> NK cells in three groups was determined by flow cytometry. Each dot represents one participant. Statistical significance between two groups was determined by Mann-Whitney U-test. \* $p < 0.05$ , \*\* $p < 0.01$ , \*\*\* $p < 0.001$ , and \*\*\*\* $p < 0.0001$

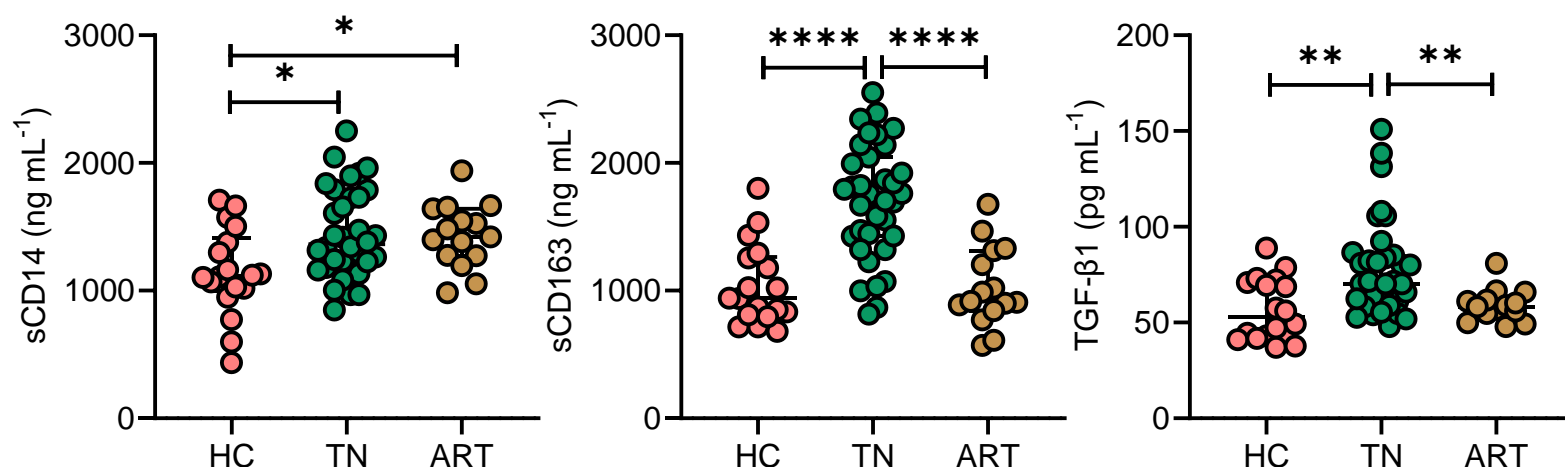

**Supplementary Figure 6. The level of plasma inflammatory markers in healthy controls and HIV-1-infected participants**

Comparisons of the plasma levels of sCD14, sCD163, and TGF-β1 in HCs (n = 18), treatment-naïve HIV-1-infected patients (TNs; n = 34), and HIV-1-infected patients with successful antiretroviral therapy (ARTs; n = 15). Each dot represents one participant. Statistical significance between two groups was determined using Mann-Whitney U-test. \*p < 0.05, \*\*p < 0.01, and \*\*\*\*p < 0.0001



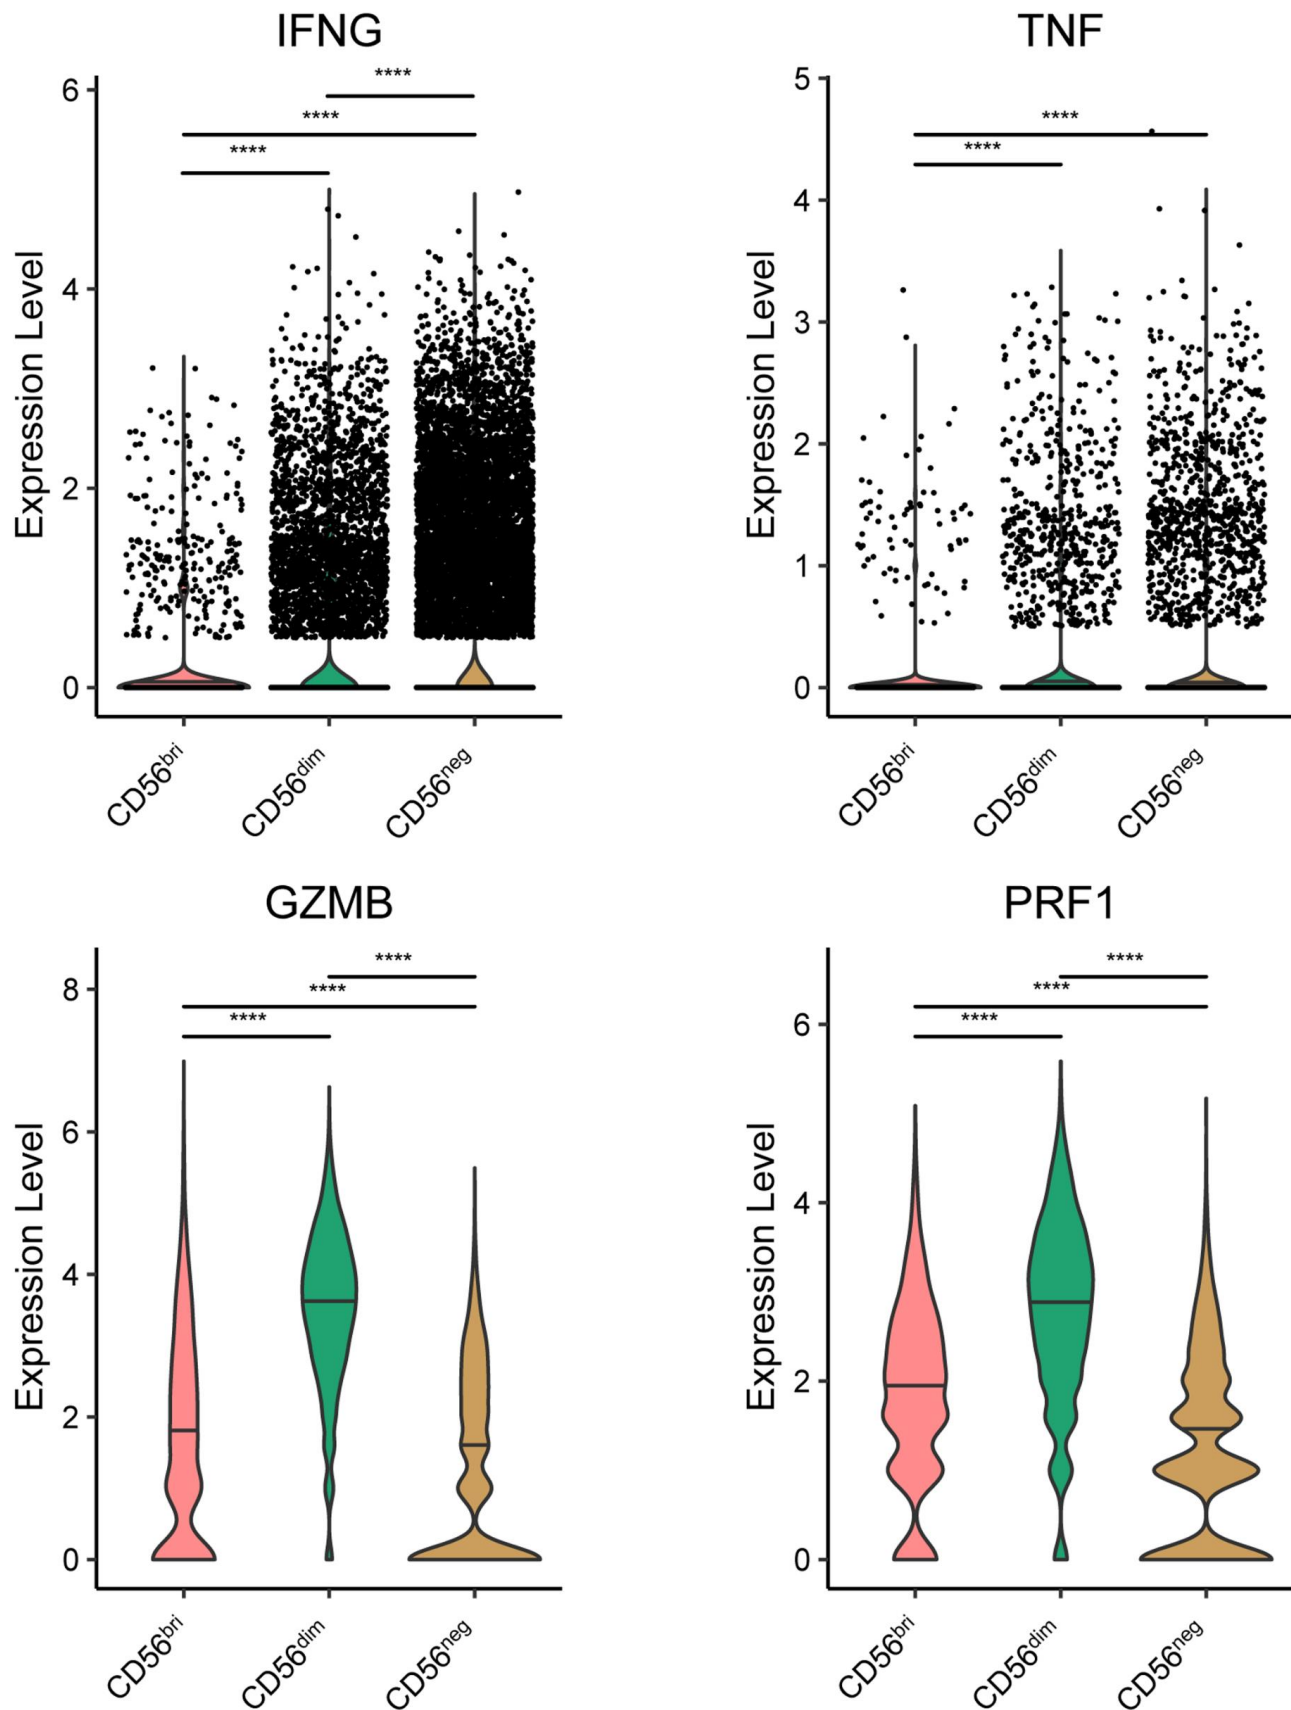

**Supplementary Figure 7. Jitter and violin plots showing single-cell expression levels of selected genes in cells derived from peripheral blood of HIV-1-infected patients**

Expression levels were calculated by  $\log_2(count + 1)$ , in which *count* represents the unique molecular identifier (UMI) count of a particular gene. Statistical significance between two groups was calculated using Mann-Whitney U-test. \*\*\*\*p < 0.0001

**A**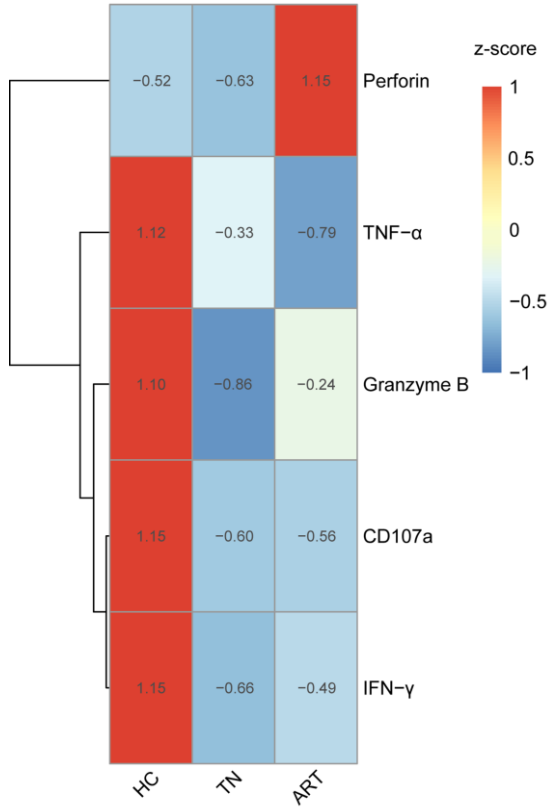**B**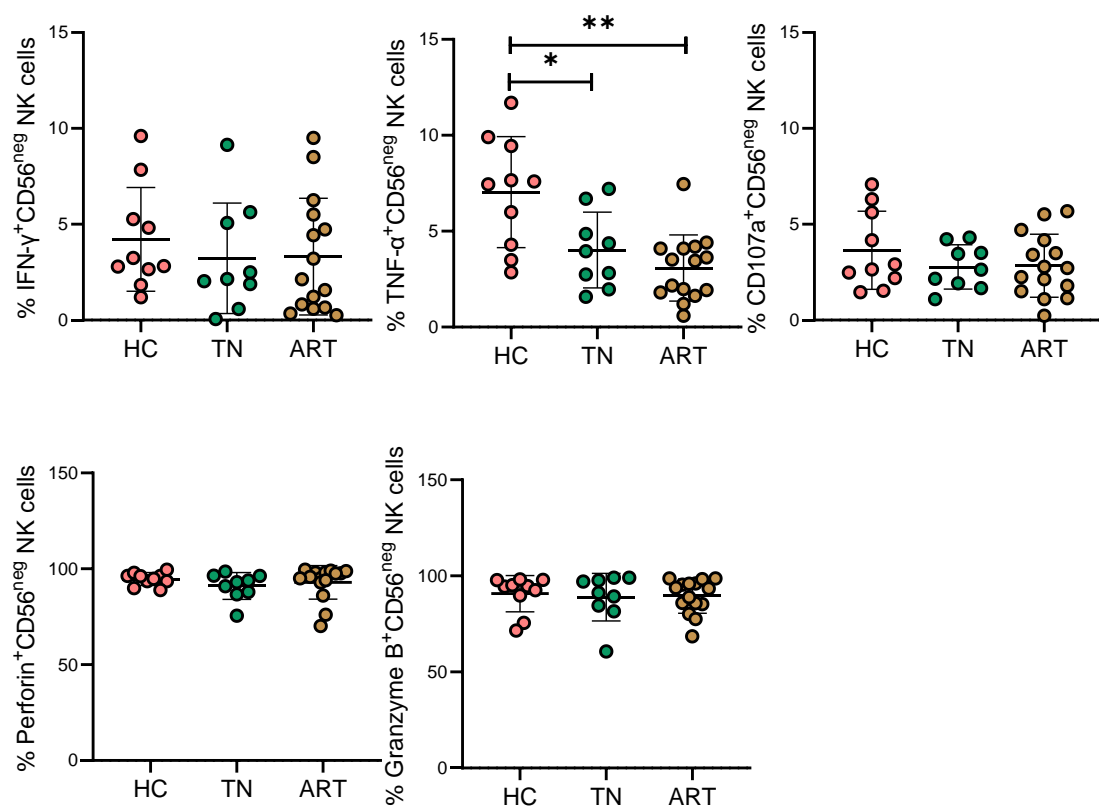

### Supplementary Figure 8. The functions of CD56<sup>neg</sup> NK cells from three groups of participants

Heatmap (A) and scatter plot (B) showing the expression of IFN- $\gamma$ , TNF- $\alpha$ , CD107a, perforin, and granzyme B in CD56<sup>neg</sup> NK cells from HC, TN, ART. Each dot represents one participant. Statistical significance between two groups was determined by Mann-Whitney U-test. \* $p < 0.05$  and \*\* $p < 0.01$

**Supplementary Table 1. Characteristics of HIV-1-infected patients with successful antiretroviral therapy (ARTs)**

| <b>Characteristics</b>                                | <b>ARTs<br/>(n=29)</b> |
|-------------------------------------------------------|------------------------|
| CD4 Count before ART, cells/ $\mu$ L,<br>Median (IQR) | 382<br>(320~445)       |
| Viral load before ART, Log copies/mL,<br>median (IQR) | 4.54<br>(4.06~4.83)    |
| Duration of ART, months, median (IQR)                 | 38 (26~43)             |
| ART regimen, n (%)                                    |                        |
| 3TC/TDF/EFV                                           | 27 (93)                |
| 3TC/AZT/EFV                                           | 2 (7)                  |
| Transmission route, n (%)                             |                        |
| MSM                                                   | 26 (90)                |
| Heterosexual                                          | 2 (7)                  |
| Blood transfusion                                     | 1 (3)                  |

All values, except for the ART regimen and transmission route, are expressed as median (interquartile range, IQR). Abbreviations: 3TC, lamivudine; TDF, tenofovir disoproxil fumarate; EFV, efavirenz; AZT, zidovudine; MSM, men who have sex with men

**Supplementary Table 2. Reagents used for flow cytometry analyses**

| <b>Antibodies</b>              | <b>Source</b>   | <b>Clone</b> | <b>Identifier</b> |
|--------------------------------|-----------------|--------------|-------------------|
| APC-Fire 750 anti-human CD3    | BioLegend       | SK7          | 344840            |
| APC-Fire 750 anti-human CD14   | BioLegend       | 63D3         | 367120            |
| APC-Fire 750 anti-human CD20   | BioLegend       | 2H7          | 302358            |
| PerCP anti-human CD16          | BioLegend       | 3G8          | 302030            |
| BV421 anti-human CD16          | BD              | 3G8          | 562874            |
| BV421 anti-human CD56          | BioLegend       | HCD56        | 318328            |
| APC anti-human CD56            | Tongshengshidai | NA           | Z6410017          |
| PE-Cy7 anti-human CD56         | BioLegend       | HCD56        | 318318            |
| APC anti-human-CD39            | BioLegend       | A1           | 328210            |
| FITC anti-human Ki67           | BioLegend       | Ki-67        | 350508            |
| PE-Cy7 anti-human CD62L        | BioLegend       | DREG-56      | 304822            |
| AF647 anti-human NKp44         | BD              | P44-8.1      | 558563            |
| AF647 anti-human NKp30         | BD              | P30-15       | 558408            |
| FITC anti-human NKG2A          | MACS            | REA110       | 130-113-565       |
| BV510 anti-human NKp46         | BioLegend       | 9E2          | 331924            |
| eF660 anti-human EOMES         | Thermo Fisher   | WD1928       | 50-4877-42        |
| PE-Cy7 anti-hum Tim-3          | Thermo Fisher   | F38-2E2      | 25-3109-42        |
| PE anti-hum Tim-3              | BD              | 7D3          | 565570            |
| BV421 anti-human T-bet         | BioLegend       | 4B10         | 644816            |
| BV510 anti-human CD69          | BioLegend       | FN50         | 310936            |
| PE-Cy7 anti-human CD69         | BioLegend       | FN50         | 557745            |
| PE anti-human NKG2C            | BioLegend       | S19005E      | 375004            |
| FITC anti-human CD57           | BioLegend       | HNK-1        | 359604            |
| APC anti-human CCR7            | BD              | G043H7       | 353214            |
| FITC anti-human CD32           | BioLegend       | FUN-2        | 303204            |
| PE anti-human CD95             | BD              | DX2          | 555674            |
| BV510 anti-human PD-1          | BioLegend       | EH12.1       | 563076            |
| PE anti-human TIGIT            | BioLegend       | A15153G      | 372704            |
| PE-Cy7 anti-human NKG2D        | BioLegend       | 1D11         | 320812            |
| APC anti-human CD7             | BioLegend       | CD7-6B7      | 343108            |
| FITC anti-human CD107a         | BioLegend       | H4A3         | 328606            |
| FITC anti-human IFN- $\gamma$  | BioLegend       | 4SB3         | 502506            |
| BV421 anti-human TNF- $\alpha$ | BioLegend       | MAb11        | 502932            |
| APC anti-human Granzyme B      | BD              | GB11         | 560212            |
| PE-Cy7 anti-human Perforin     | BioLegend       | dG9          | 308126            |

**Supplementary Table 3. Selected genes used for calculating five function module scores**

| Function Modules                 | Genes Used for Module Score                                                                                    |
|----------------------------------|----------------------------------------------------------------------------------------------------------------|
| Cytotoxicity                     | GZMA, GZMB, GZMH, GZMM, GZMK, GNLY, PRF1, CTSW                                                                 |
| Cytokine and Chemokine Receptors | IL7R, IL2RB, IL21R, CXCR3, CXCR4, CCR7, CXCR1, S1PR5                                                           |
| Adhesion Molecules               | ITGAL, CD2, CD58, ITGB2, SELL, CD96                                                                            |
| Exhaustion                       | LAG3, TIGIT, PDCD1, HAVCR2, TOX                                                                                |
| Apoptosis                        | FAS, CRIP1, IFI27, CD74, IFNG, HERPUD1, HMGB2, LCK, BCL2A1, RPL11, TYROBP, CD3E, LGALS3, JUN, PRELID1, IFI27L2 |

**Supplementary Table 4. Top 10 upregulated and downregulated biological process**

| ID         | Description                                                         | GeneRatio | BgRatio   | pvalue   | p.adjust | qvalue   | Count | Regulation |
|------------|---------------------------------------------------------------------|-----------|-----------|----------|----------|----------|-------|------------|
| GO:0006614 | SRP-dependent cotranslational protein targeting to membrane         | 44/147    | 105/18862 | 7.93E-67 | 1.85E-63 | 1.54E-63 | 44    | Up         |
| GO:0006613 | cotranslational protein targeting to membrane                       | 44/147    | 110/18862 | 1.06E-65 | 6.62E-63 | 5.51E-63 | 44    | Up         |
| GO:0000184 | nuclear-transcribed mRNA catabolic process, nonsense-mediated decay | 45/147    | 120/18862 | 1.14E-65 | 6.62E-63 | 5.51E-63 | 45    | Up         |
| GO:0045047 | protein targeting to ER                                             | 45/147    | 120/18862 | 1.14E-65 | 6.62E-63 | 5.51E-63 | 45    | Up         |
| GO:0072599 | establishment of protein localization to endoplasmic reticulum      | 45/147    | 124/18862 | 6.94E-65 | 3.23E-62 | 2.69E-62 | 45    | Up         |
| GO:0070972 | protein localization to endoplasmic reticulum                       | 45/147    | 152/18862 | 3.80E-60 | 1.47E-57 | 1.23E-57 | 45    | Up         |
| GO:0019083 | viral transcription                                                 | 46/147    | 180/18862 | 3.67E-58 | 1.22E-55 | 1.02E-55 | 46    | Up         |
| GO:0006413 | translational initiation                                            | 46/147    | 193/18862 | 1.35E-56 | 3.93E-54 | 3.27E-54 | 46    | Up         |
| GO:0019080 | viral gene expression                                               | 46/147    | 198/18862 | 5.01E-56 | 1.30E-53 | 1.08E-53 | 46    | Up         |
| GO:0000956 | nuclear-transcribed mRNA catabolic process                          | 45/147    | 208/18862 | 3.16E-53 | 7.37E-51 | 6.14E-51 | 45    | Up         |
| GO:0034341 | response to interferon-gamma                                        | 27/341    | 197/18862 | 2.49E-16 | 9.64E-13 | 7.50E-13 | 27    | Down       |
| GO:0071346 | cellular response to interferon-gamma                               | 24/341    | 177/18862 | 1.53E-14 | 2.96E-11 | 2.30E-11 | 24    | Down       |
| GO:0042110 | T cell activation                                                   | 36/341    | 474/18862 | 3.61E-13 | 4.67E-10 | 3.63E-10 | 36    | Down       |
| GO:0002831 | regulation of response to biotic stimulus                           | 32/341    | 420/18862 | 7.33E-12 | 7.10E-09 | 5.52E-09 | 32    | Down       |
| GO:0007159 | leukocyte cell-cell adhesion                                        | 29/341    | 366/18862 | 2.88E-11 | 2.23E-08 | 1.74E-08 | 29    | Down       |
| GO:0042119 | neutrophil activation                                               | 34/341    | 500/18862 | 3.59E-11 | 2.32E-08 | 1.80E-08 | 34    | Down       |
| GO:0002683 | negative regulation of immune system process                        | 30/341    | 403/18862 | 6.08E-11 | 3.37E-08 | 2.62E-08 | 30    | Down       |
| GO:0043312 | neutrophil degranulation                                            | 32/341    | 485/18862 | 3.00E-10 | 1.46E-07 | 1.13E-07 | 32    | Down       |
| GO:0002283 | neutrophil activation involved in immune response                   | 32/341    | 488/18862 | 3.51E-10 | 1.51E-07 | 1.18E-07 | 32    | Down       |
| GO:0002446 | neutrophil mediated immunity                                        | 32/341    | 499/18862 | 6.13E-10 | 2.38E-07 | 1.85E-07 | 32    | Down       |
